# Supplementary material for: Optimizing Vaccination Strategies against African Swine Fever Using Spatial Data from Wild Boars in Lithuania
Source: MDPI journal article supplement (doi:10.3390/v16010153), 2024-01-19
Supplement: s1 [file s1]

**Table S1.** Individual characteristics and monitoring patterns of 27 wild boars captured in Lithuania in the period 2020-2022 and monitored through GPS-GSM collars.

| Wild boar | Sex    | Age class |
|-----------|--------|-----------|
| 8006      | female | yearling  |
| 8008      | male   | adult     |
| 8011      | male   | yearling  |
| 8019      | female | adult     |
| 8030      | male   | adult     |
| 8031      | male   | adult     |
| 8032      | male   | yearling  |
| 8036      | male   | adult     |
| 8037      | male   | adult     |
| 8039      | male   | juvenile  |
| 8041      | male   | adult     |
| 8042      | male   | yearling  |
| 8043      | female | yearling  |
| 8045      | male   | yearling  |
| 211227    | male   | adult     |
| 216860    | male   | yearling  |
| 216861    | male   | juvenile  |
| 216862    | male   | juvenile  |
| 216863    | male   | juvenile  |
| 216865    | male   | yearling  |
| 216867    | male   | adult     |
| 8032_bis  | male   | yearling  |
| 8033_bis  | female | yearling  |
| 8037_bis  | male   | yearling  |
| 8040_bis  | male   | yearling  |
| 8042_bis  | male   | adult     |
| 8043_bis  | female | adult     |
